# Supplementary material for: Temperature-responsive properties of poly(4-vinylpyridine) coatings: influence of temperature on the wettability, morphology, and protein adsorption
Source: Royal Society of Chemistry journal article supplement (doi:10.1039/c6ra07223b), 2016-01-01
Supplement: c6ra07223b1.pdf [file c6ra07223b1.pdf]

# Temperature-responsive properties of poly(4-vinylpyridine) coatings: Influence of temperature on wettability, morphology, and protein adsorption<sup>+</sup>

*Joanna Raczkowska*<sup>1\*</sup>, *Yurij Stetsyshyn*<sup>2\*</sup>, *Kamil Awsiuk*<sup>1</sup>, *Joanna Zemla*<sup>1</sup>, *Andrij Kostruba*<sup>3</sup>, *Khrystyna Harhay*<sup>2</sup>, *Mateusz Marzec*<sup>4</sup>, *Andrzej Bernasik*<sup>4,5</sup>, *Ostap Lishchynskiy*<sup>2</sup>, *Halyna Ohar*<sup>2</sup>, *Andrzej Budkowski*<sup>1</sup>

<sup>1</sup>Smoluchowski Institute of Physics, Jagiellonian University, Łojasiewicza 11, 30-348 Kraków, Poland

<sup>2</sup>Lviv Polytechnic National University, S. Bandery 12, 79013 Lviv, Ukraine

<sup>3</sup>Lviv Academy of Commerce, Samtshuk 9, and Lviv Institute for Physical Optics, Dragomanov 19, 79011 Lviv, Ukraine

<sup>4</sup>Academic Centre for Materials and Nanotechnology, al. A. Mickiewicza 30, 30-059 Kraków, Poland

<sup>5</sup>AGH University of Science and Technology, Faculty of Physics and Applied Computer Science, al. A. Mickiewicza 30, 30-059 Kraków, Poland

---

\*Corresponding authors E-mail: Yurij Stetsyshyn [yrstecushun@ukr.net](mailto:yrstecushun@ukr.net), Joanna Raczkowska [joanna.raczkowska@uj.edu.pl](mailto:joanna.raczkowska@uj.edu.pl)

<sup>+</sup>Electronic supplementary information (ESI) available: Scheme of the procedure used to prepare P4VP grafted brushes, X-ray photoelectron spectroscopy data confirming surface coverage with P4VP grafted brushes.

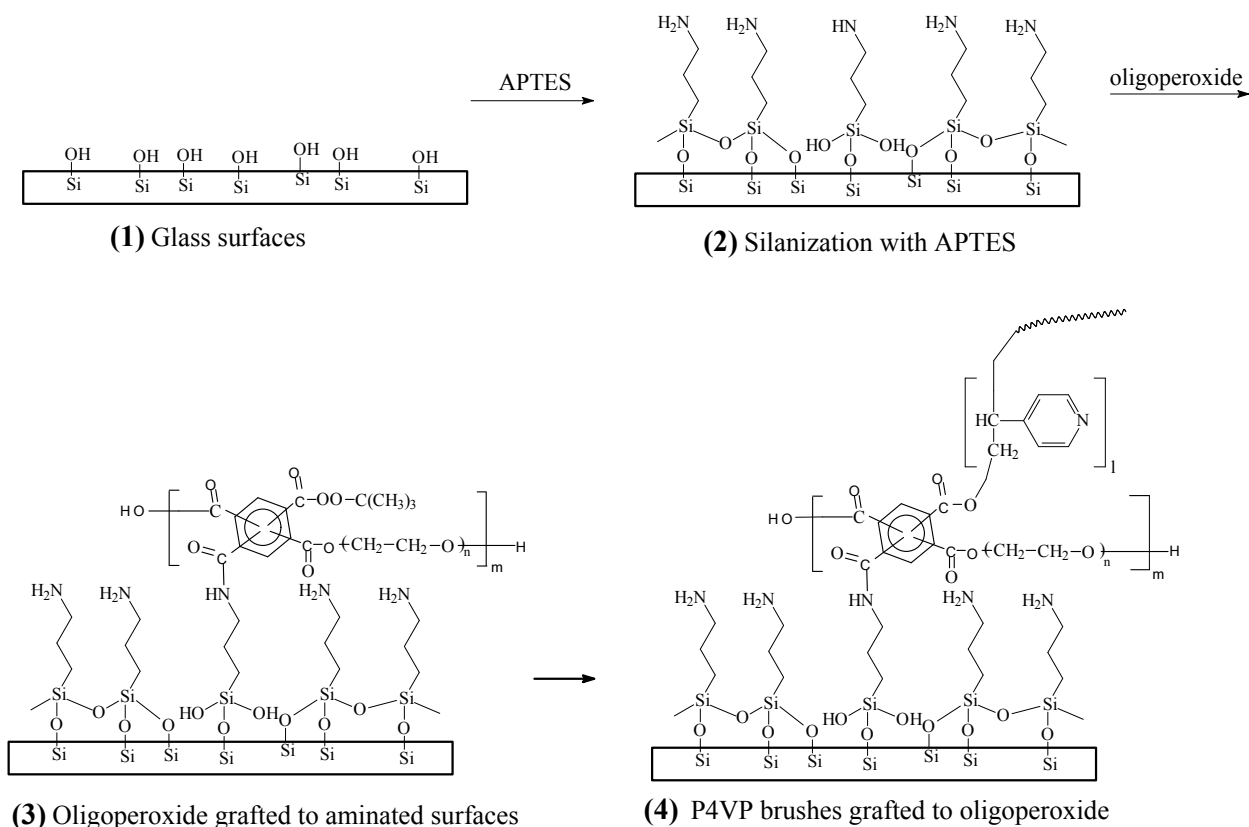

**Scheme S1.** Functionalization of glass surface (1) with amino-terminated APTES film (2), subsequent grafting of oligoperoxide (3), and polymerization of 4VP, initiated by peroxide groups of oligoperoxide and resulting in P4VP brushes (4).

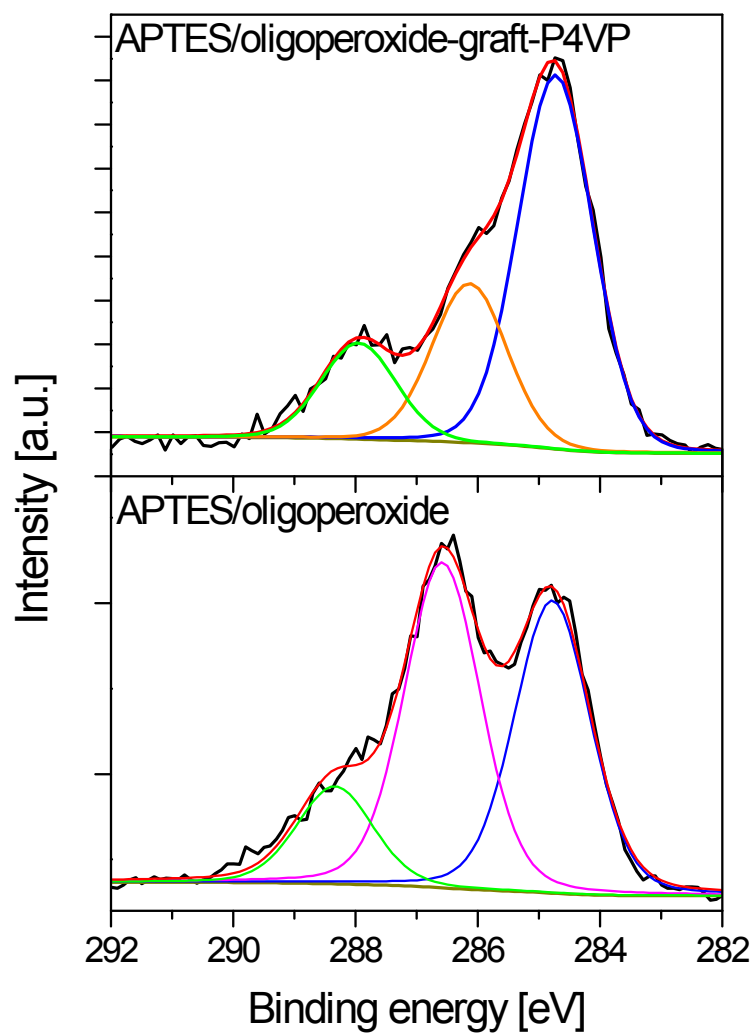

**Fig.S1.** XPS Representative C 1s XPS spectra of the APTES-modified glass surface after subsequent steps of oligoperoxide grafting for 24 h and 4VP polymerization for 48 h.
